# Supplementary material for: Mental Health Component Scale Is Positively Associated with Riboflavin Intake in People with Central Obesity
Source: MDPI journal article supplement (doi:10.3390/nu15204464), 2023-10-21
Supplement: s1 [file s1]

**Supplementary material related to:**

**Riboflavin intake is positively associated with the mental health component scale  
in people with central obesity**

Charalampia Amerikanou<sup>1</sup>, Aristeia Gioxari<sup>2</sup>, Stamatia-Angeliki Kleftaki<sup>1</sup>, Evdokia  
Valsamidou<sup>1</sup>, Antonia Zeaki<sup>1</sup>, Andriana C. Kaliora<sup>1</sup>

<sup>1</sup>Department of Nutrition and Dietetics, School of Health Science and Education,  
Harokopio University of Athens, 70 El. Venizelou Ave., 17676 Athens, Greece

<sup>2</sup>Department of Nutritional Science and Dietetics, School of Health Science,  
University of the Peloponnese, Antikalamos, 24100 Kalamata-Messinia, Greece;

\*Correspondence: A. C. Kaliora (akaliora@hua.gr), Department of Nutrition and  
Dietetics, School of Health Science and Education, Harokopio University of Athens,  
70 El. Venizelou Ave., 17676 Athens, Greece, +30 2109549226

**Supplementary Table S1. Micronutrient intakes in males and females along with the respective Recommended Dietary Allowances (RDAs) and Adequate Intakes (AIs)**

| Micronutrients               | Males (N=39)                                 | Adult Males             | Females (N=61)                               | Adult Females           |
|------------------------------|----------------------------------------------|-------------------------|----------------------------------------------|-------------------------|
|                              | Median (IQR) or Mean<br>± standard deviation | Recommend<br>ed Intakes | Median (IQR) or Mean<br>± standard deviation | Recommende<br>d Intakes |
| Vitamin A (µg/d)             | 267.0 (222.2)                                | 900                     | 297.6 (295.6)                                | 700                     |
| Beta-Carotene (µg/d)         | 922.2 (968.7)                                | N/A                     | 755.9 (1635.0)                               | N/A                     |
| Alpha-Carotene (µg/d)        | 87.6 (151.6)                                 | N/A                     | 67.2 (457.1)                                 | N/A                     |
| Lutein (+ Zeaxanthin) (µg/d) | 583.5 (1231.4)                               | N/A                     | 794.6 (977.0)                                | N/A                     |
| Beta-Cryptoxanthin (µg/d)    | 16.0 (142.1)                                 | N/A                     | 26.6 (111.5)                                 | N/A                     |
| Lycopene (µg/d)              | 1582.4 (2474.6)                              | N/A                     | 1292.7 (2959.4)                              | N/A                     |
| Vitamin C (mg/d)             | 65.1 ± 40.7                                  | 90                      | 46.3 (48.1)                                  | 75                      |
| Vitamin D (µg/d)             | 2.0 ± 1.7                                    | 10*                     | 2.2 ± 1.6                                    | 10*                     |
| Vitamin E (mg/d)             | 6.2 (3.4)                                    | 15                      | 7.1 ± 3.1                                    | 15                      |
| Thiamin (mg/d)               | 1.1 ± 0.5                                    | 1.2                     | 1.1 ± 0.4                                    | 1.1                     |
| Riboflavin (mg/d)            | 1.2 (0.7)                                    | 1.3                     | 1.2 (0.8)                                    | 1.1                     |
| Niacin (mg/d)                | 16.3 ± 8.4                                   | 16                      | 13.3 (9.2)                                   | 14                      |
| Pyridoxine (mg/d)            | 1.5 ± 0.6                                    | 1.6                     | 1.3 (0.8)                                    | 1.3                     |
| Folate Total (µg/d)          | 256.4 ± 117.3                                | 400                     | 234.4 (205.5)                                | 400                     |
| Cobalamin (µg/d)             | 2.2 (1.5)                                    | 2.4                     | 2.3 (1.2)                                    | 2.4                     |
| Biotin (µg/d)                | 12.9 ± 9.0                                   | 30*                     | 9.5 (11.3)                                   | 30*                     |
| Pantothenic Acid (mg/d)**    | 2.9 ± 1.6                                    | 5*                      | 3.4 ± 1.3                                    | 5*                      |
| Choline (mg/d)               | 171.5 (86.6)                                 | 550*                    | 160.9 (145.3)                                | 425*                    |
| Vitamin K (µg/d)             | 65.3 (41.2)                                  | 120*                    | 53.1 (48.7)                                  | 90*                     |
| Calcium (mg/d)**             | 629.8 (273.7)                                | 1000*                   | 710.3 ± 285.2                                | 1000*                   |
| Iron (mg/d)                  | 10.2 (4.1)                                   | 8                       | 9.7 (7.5)                                    | 8                       |
| Sodium (mg/d)                | 1307.7 (776.8)                               | 1500*                   | 1262.5 ± 692.5                               | 1500*                   |
| Potassium (mg/d)             | 1826.3 (1077.8)                              | 3400                    | 1941.6 ± 764.9                               | 2600                    |
| Phosphorus (mg/d)            | 796.0 (316.2)                                | 550                     | 938.7 (316.4)                                | 550                     |
| Magnesium (mg/d)             | 195.5 (146.3)                                | 420                     | 212.1 ± 76.2                                 | 320                     |
| Zinc (mg/d)                  | 7.3 (3.4)                                    | 11                      | 7.3 (3.2)                                    | 8                       |
| Copper (mg/d)                | 0.8 (0.4)                                    | 0.9                     | 0.8 (0.4)                                    | 0.9                     |
| Manganese (mg/d)             | 1.8 (0.8)                                    | 2.3*                    | 2.0 (1.2)                                    | 1.8*                    |
| Selenium (µg/d)**            | 80.1 ± 36.9                                  | 55                      | 77.8 ± 34.1                                  | 55                      |
| Chromium (mg/d)              | 0.03 (0.03)                                  | 0.02 *                  | 0.03 (0.03)                                  | 0.03*                   |
| Molybdenum (µg/d)            | 16.2 (36.5)                                  | 45                      | 12.7 (25.6)                                  | 45                      |

\*Recommended Dietary Allowances (RDAs) in ordinary type and Adequate Intakes (AIs) are followed by an asterisk (\*). RDAs and AIs may both be used as goals for individual intake. RDAs are set to meet the needs of almost all (97 to 98 percent) individuals in a

group. The AI is believed to cover the needs of all individuals in the group, but a lack of data or uncertainty in the data prevents being able to specify with confidence the percentage of individuals covered by this intake. [1,2]

\*\*Variables are presented as median (IQR) or mean  $\pm$  standard deviation depending on their distribution in each sex.

### **References**

1. Institute of Medicine (2003) Dietary Reference Intakes: Guiding Principles for Nutrition Labeling and Fortification. Washington, DC: The National Academies Press. <https://doi.org/10.17226/10872>.
2. National Academies of Sciences, Engineering, and Medicine (2019) Dietary Reference Intakes for Sodium and Potassium. Washington, DC: The National Academies Press. <https://doi.org/10.17226/25353>.
